# Supplementary material for: 12 years of continuous atmospheric O 2 , CO 2 and APO data from Weybourne Atmospheric Observatory in the United Kingdom
Source: Copernicus journal article supplement (doi:10.5194/essd-2023-129), 2023-05-12
Supplement: Supplementary file [file essd-2023-129-AC1-supplement.pdf]

## Reviewer one comments

Adcock et al present a 12 year time series of O<sub>2</sub>/N<sub>2</sub>, CO<sub>2</sub>, and the tracer APO from a coastal background site in the UK. This is a unique, high quality dataset highly worthy of publication in ESSD. I recommend publication after some revisions. My main issue with this paper is that it is overly long without being detailed enough. At least half of the paper is devoted to an analysis of the dataset, which per the ESSD guidelines is not supposed to be included. This seems to come at the expense of detailed information on changes in the measurement system and technical issues, which are not fully described and could be of interest to anyone trying to actually use the data. My suggestion is to generate a complete list of calibration, target, and zero tank changes with IDs and assigned values (where applicable), and a complete change log or README type file where the major alterations to the measurement system are fully described, with exact dates. This shouldn't be too difficult to generate given the figures presented (i.e. the authors must have this information in hand to create the figures). There is a long paragraph of significant changes with approximate dates which would already form the basis of such a table. I am asking for this because in 10 or 20 years, someone may wish to analyze the time series but not have enough information as presented to understand whether a given feature is a real signal or an artifact. The paper also contains a lot of verbalization of data which is already in a table. It's a very long paper, and cutting this redundant text will make for less text to sift through.

We thank the reviewer for their positive comments and thorough review of our manuscript which has helped us to improve the text and figures. We will address the general points raised below.

Regarding the comment about the amount of analysis of the dataset in our manuscript. We think that there is a difference between describing the key features of the dataset, and actually analysing or interpreting the dataset. For example, we think it's acceptable to talk about the average long-term trends and seasonal cycles and to describe in general terms what is causing these. Other ESSD articles have included similar descriptions of key features e.g. Nguyen et al., 2022; Friedlingstein et al., 2022, and so we do not consider our manuscript to be out of the ESSD scope.

Nguyen, L. N. T., et al.: Two decades of flask observations of atmospheric  $\delta(\text{O}_2/\text{N}_2)$ , CO<sub>2</sub> and APO at stations Lutjewad (the Netherlands) and Mace Head (Ireland), and 3 years from Halley station (Antarctica), 14, 991–1014, <https://doi.org/10.5194/essd-14-991-2022>, 2022.

Friedlingstein, P., et al.: Global Carbon Budget 2022, *Earth Syst. Sci. Data*, 14, 4811–4900, <https://doi.org/10.5194/essd-14-4811-2022>, 2022.

Therefore, we don't think we need to remove all of Section 4; however, we have decided to shorten and reword some of the text, and to exclude some figures and tables that present more than the basic features of the dataset. Consequently, we have removed Figure 14 (interannual variability of long-term trends), Table 6 (seasonal maximum & minimums), Table 7 (zero crossing dates), Figure 16 (interannual variability in seasonal amplitude) and Table 8 (diurnal cycles).

We respectfully disagree with the reviewer's comment that a table of all the cylinders and a change log should be added to the manuscript. This is not something that is typically expected for measurement-related papers. It is unlikely that we could document all these changes thoroughly in a paper in a way in which the reader would be able to understand the implications on the data quality. The data have undergone full quality control and we would not publish them if we were concerned that such changes to the measurement system had compromised the data quality. We encourage data users to contact us if they have questions about specific features of the dataset.

We agree with the reviewer's comment that there is some redundant verbalization of the tables and figures, so we have cut some of the text. Please see our replies below for more information on specific sections.

1. My last major comment is that the correction to the APO record is speculative at best. Forcing the WAO data to fit the CBA record is a creative approach, but the impact this has on the WAO data was not demonstrated. As I understand it it relies on the assumption that fractionation through a torn diaphragm was constant over shorter time scales, but not over several months. Is there any basis for making this determination? I understand the desire to salvage a significant chunk of data, and I think this is generally an OK approach, but the authors could have done more to convince me that it was reasonable. Could they perform the same baseline shift exercise on data which was not impacted at WAO and see how the residuals compare--do they have any structure? And what do the corrected vs uncorrected residuals look like? At the very least, this data should be better flagged in the data file--right now it is flagged as "2", which means "contact data provider". A separate flag for "corrected" or "baseline shifted" should be implemented.

We understand that the reviewer has some concerns about the adjustment applied to the 2018/2019 data. We hope that we can allay these concerns. Firstly, it is not uncommon to correct periods of data in this way, for example, Max Planck Institute for Biogeochemistry (MPI-BGC) used a similar method to adjust their O<sub>2</sub> flask data after they discovered a leak in a valco valve (Rödenbeck et al., 2023). Secondly, we already provided detail regarding the quality control checks we carried out to ensure our pump correction was reasonable, as shown in Section S1 of the supplement. We used the Cold Bay Alaska data to apply the adjustment, and then used the Shetland Islands data to check that the adjustment was reasonable.

Rödenbeck, C., et al., The suitability of atmospheric oxygen measurements to constrain Western European fossil-fuel CO<sub>2</sub> emissions and their trends, *EGUsphere* [preprint], <https://doi.org/10.5194/egusphere-2023-767>, 2023.

We have included a plot below of the data excluding baseline variability for the adjusted-leak data and for the 9 months after the leak, to show that the variation excluding the baseline is similar for both time periods.

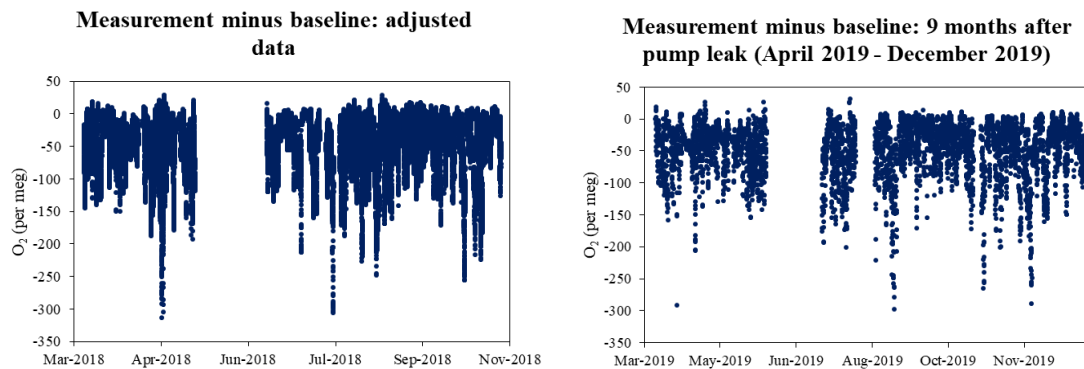

We have also included a plot below showing the data excluding the baseline for the leak period, before the adjustment was applied and afterwards, to show that the variation excluding the baseline is similar in both cases.

## Residuals before and after adjustment

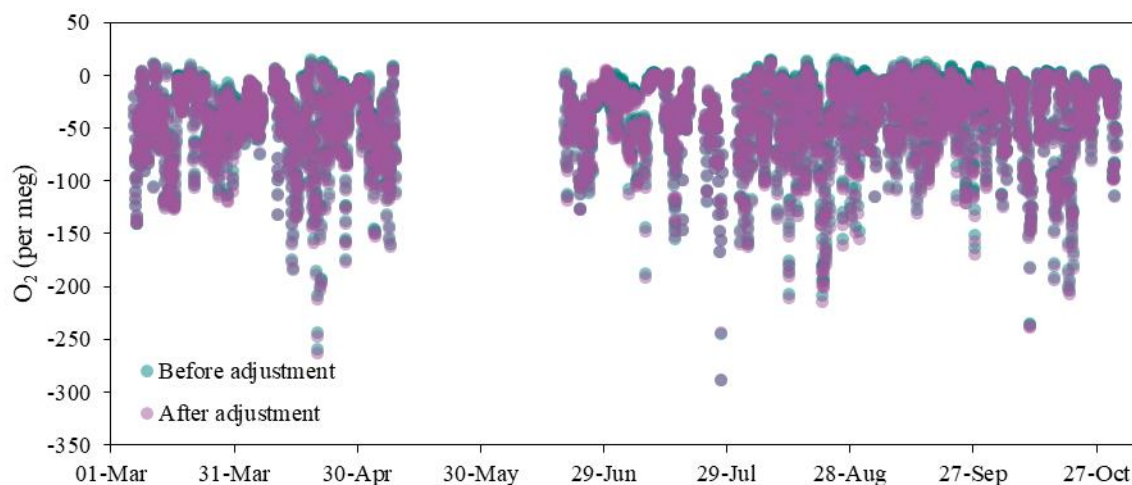

We would prefer to keep the data flag as “contact data provider” as this is consistent with the set of standardised flags we are required to use when we upload these data to community databases and repositories. We strongly encourage all users of the data to contact us in any case, and we are happy to discuss the pump correction period with data users directly and in relation to their specific analysis if they have additional queries.

### Minor comments:

2. General comment: The use of O<sub>2</sub> mole fraction throughout is confusing. It is a term with a specific meaning, and I don't find it more convenient to alter its meaning for this particular paper.

While we appreciate our use of O<sub>2</sub> mole fraction may be confusing to those outside of the O<sub>2</sub> measurement community, there is a long and established precedent for using mole fraction to refer to atmospheric O<sub>2</sub> measurements in the existing literature, e.g.:

- Keeling, R. F.: Measuring correlations between atmospheric oxygen and carbon dioxide mole fractions: A preliminary study in urban air, 7, 153–176, <https://doi.org/10.1007/BF00048044>, 1988.
- Tohjima, Y., Machida, T., Watai, T., Akama, I., Amari, T., and Moriwaki, Y.: Preparation of gravimetric standards for measurements of atmospheric oxygen and reevaluation of atmospheric oxygen concentration, *J. Geophys. Res. D Atmos.*, 110, 1–11, <https://doi.org/10.1029/2004JD005595>, 2005.

We would prefer not to deviate from the established practice of our community and wish to continue to use the term O<sub>2</sub> mole fraction in our manuscript. In some places, it would be incorrect and misleading to use the term  $\delta(\text{O}_2/\text{N}_2)$  because our analyser does not directly measure  $\delta(\text{O}_2/\text{N}_2)$  ratios, and because we convert our O<sub>2</sub> mole fraction measurements in units of “ppm equivalent” to per meg values. We would also prefer not to use the term ‘concentration’, because it is generally only accepted that this is used when communicating to non-scientific audiences, as mentioned in the latest WMO Global Atmosphere Watch report on GHG and related tracer measurement techniques (WMO report #255).

3. General comment: The figures are not color blind safe, please use different symbols in addition to the colors selected, or use a different palette.

We agree with the reviewer and have amended figures 1, 3, 4, 7, 8, 9, 10, 14 and 15 to be more colourblind friendly, please see the amended version of the manuscript.

4. L16: APO is not a tracer for terrestrial biosphere processes, this would be better phrased as "insensitive to terrestrial biosphere fluxes".

We have decided to change the word “conservative” to “invariant”, so we changed the phrase from:

a tracer that is conservative with respect to terrestrial biosphere processes

To:

a tracer that is invariant to terrestrial biosphere fluxes

5. L27-47: This is a fine introduction, but the paper is 47 pages long and its goal is simply to describe the data set. These two paragraphs could be consolidated into a sentence or two, pointing to some key references. I don't think it's necessary to list all of the ORs for different fuel types, for instance.

We agree with the reviewer and have shortened these two paragraphs and combined them into one paragraph.

6. L52: A good place to include the equation for O<sub>2</sub>/N<sub>2</sub>

We have added the equation for O<sub>2</sub>/N<sub>2</sub>, and also the reference:

As such, atmospheric O<sub>2</sub> mole fractions are typically reported as changes in the ratio of O<sub>2</sub> to N<sub>2</sub>, relative to a reference O<sub>2</sub>/N<sub>2</sub> ratio (Keeling and Shertz, 1992).

$$\delta(O_2/N_2) = \frac{(O_2/N_2)_{sample} - (O_2/N_2)_{reference}}{(O_2/N_2)_{reference}} \quad (1)$$

7. L58-59: I don't understand, per meg is used throughout the paper...?

Per meg is the unit we use for O<sub>2</sub>, in the same way that ppm is the unit we use for CO<sub>2</sub>, whereas “O<sub>2</sub> mole fraction” is the name of what we are actually measuring in “ppm equivalent” units, before we convert O<sub>2</sub> into per meg units. To make this clearer, we have shortened the sentence about this from:

For simplicity, in this paper we refer to O<sub>2</sub> variations as O<sub>2</sub> mole fraction changes rather than  $\delta(O_2/N_2)$  ratio changes.

To:

For simplicity, in this paper we refer to O<sub>2</sub> variations as O<sub>2</sub> mole fraction changes.

8. L60-70: Suggest to cut this paragraph, it's not necessary to explain the data being presented.

We agree with this comment and have cut this paragraph.

9. L71: "Calculated term" is awkward, suggest "tracer" or "data-derived tracer"

We respectively disagree with the reviewer as APO is a calculated term and we don't think that "data-derived tracer" is less awkward than "calculated term". "Calculated term" is not incorrect, and we would rather not change it.

10. L75: this is not what I understand a "conservative tracer" to mean

We have changed "conservative with respect" to "invariant"

11. L125: How long is the inlet line? The mast height is given, but not the total distance from the inlet to the instruments.

L126: Could you briefly describe the inlet? Dimensions, how and how much it is aspirated, etc. What is the flow rate in the sample line?

We have added in this information and the paragraph has been changed from:

There are two inlet lines (Synflex, type 1300 tubing, 1/4" OD) and the measurement system alternates sampling air between these two inlet lines every two hours to diagnose for leaks, blockages, or other faults. Each inlet line includes an aspirated air inlet, to avoid fractionation of O<sub>2</sub> molecules relative to N<sub>2</sub> (Blaine et al., 2006) and a small diaphragm pump (KNF Neuberger Inc.; model PM27653-N86ATE) to draw air through the inlet tubing.

To:

There are two inlet lines, and the measurement system alternates sampling air between these two inlet lines every two hours to diagnose for leaks, blockages, or other faults. The inlet lines are approximately 14 meters long and are made of Synflex type 1300 tubing with an outer diameter of 1/4". Each inlet line includes an aspirated air inlet (Aspirated Radiation Shield Model No. 43502, Read Scientific Ltd.), whereby the inlet samples from a moving airstream and shields the entrance from solar radiation, to avoid fractionation of O<sub>2</sub> molecules relative to N<sub>2</sub> (Blaine et al., 2006) and a small diaphragm pump (KNF Neuberger Inc.; model PM27653-N86ATE) to draw air through the inlet tubing at 100 mL min<sup>-1</sup>.

We also, added in a sentence about the flow rate later in this section:

The flow rate of the measurement system (both the sample and working reference sides) is set to 100 mL min<sup>-1</sup> using a mass flow controller (MFC, Fig. 2).

12. L298-314: This paragraph could be shortened or cut by putting the data in a table. It's not necessary to state after each result whether it is smaller or larger than 2 or 10, the reader can do this on their own. The statement that "...any systematic drift over time, indicating long-term stability of the WAO O<sub>2</sub> and CO<sub>2</sub> calibration scales" is quite misleading. Both the CCL scale and WAO scale could be drifting together, and the drift does not necessarily have to be systematic. Scales can drift over multiple time scales for many different reasons, which can appear to be scatter when sampled sparsely.

We agree with this comment and have added a table showing the intercomparison results for CO<sub>2</sub> and O<sub>2</sub>. Additionally, we removed a few sentences from the intercomparison section, including the sentences comparing to 2 and 10 per meg and the sentence about systematic drift.

13. Fig 4: Isn't the target tank a measure of the repeatability, not the compatibility? If so, the shaded bands should be half the compatibility goal as pointed out on L263.

The TTs are used both to measure the repeatability and the compatibility. The compatibility is how much in agreement the measurements at WAO are to the UEA CRAM Laboratory over both long and short-term timeframes, where TT cylinders are usually analysed before being used at WAO. In Figure 4, the UEA CRAM Laboratory values are zero on the y-axes, so Figure 4 is showing the compatibility of the TTs, and therefore the shaded band is the right size. The repeatability is calculated using the mean of  $\pm 1\sigma$  standard deviations for every two consecutive 2-minute averages for each TT run. So, the repeatability can be thought of more as a measure of short-term reproducibility under the same conditions. The repeatability is shown in Table 2.

We are using the definitions of compatibility and repeatability that come from the 20th WMO/IAEA Meeting on Carbon Dioxide, Other Greenhouse Gases and Related Measurement Techniques (GGMT-2019), Global Atmosphere Watch (GAW) Report: compatibility is a measure of the persistent bias between measurement records; and repeatability is a measure of the closeness of the agreement between the results of successive measurements over a short period of time (Crotwell et al., 2020).

14. Fig 5: The drift in the cylinders is not linear (except for maybe the last one), so I question the usefulness of showing linear fits to them. If the tanks are desorbing/fractionation with pressure, one wouldn't expect it to drift linearly anyway, unless it was leaking badly. Finally, this figure doesn't show any information not already contained in Fig 4. I recommend cutting it, or at least consolidating with Fig 4 by adding the fits to the data.

We thank the reviewer for this comment. We think that combining Fig. 4 and Fig. 5 makes the figure look cluttered and would prefer to keep them separate. We think that Fig. 5 does show something different to Fig. 4, for example, in Fig. 5 you can clearly see from the trend lines, for CO<sub>2</sub> for TT02 and TT07 that there is a small offset between the UEA CRAM Laboratory and WAO of about 0.1 ppm, which is not as easy to see in Fig. 4 because of the scatter of the data points.

We are not implying that the trends in the tanks are linear but have used linear fits to approximate the drifts over time in order to assess how significant these are within the context of WMO compatibility goals.



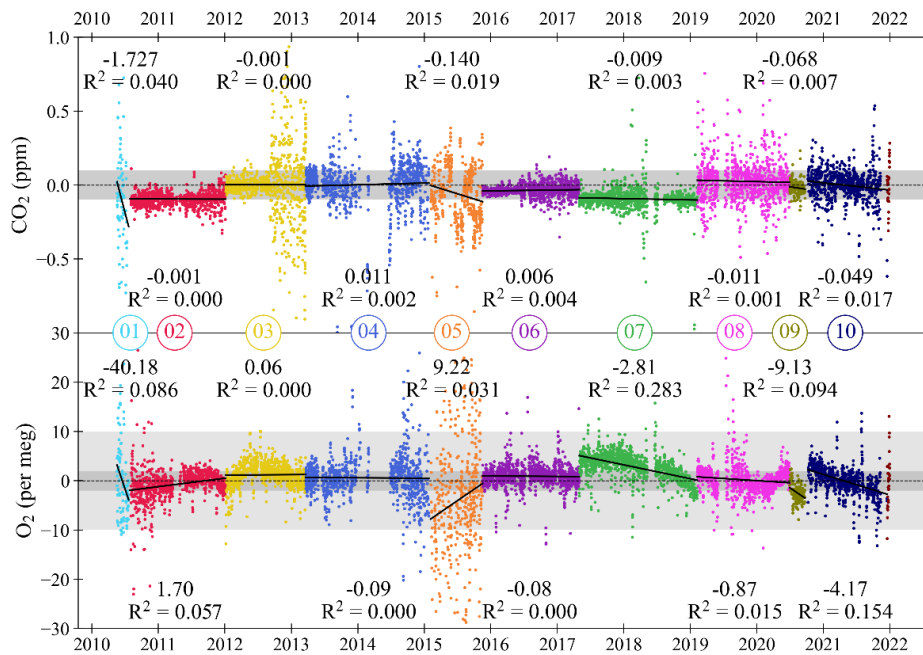

15. L395-419: This section could also be cut down, given that all of this information is in the table.

We agree with this comment and have reduced the text of this section accordingly.

16. L448: These are per meg values, not mole fractions...maybe this is what is meant in L58? If so, it is confusing and looks like an error. "Value" would work fine here.

We agree that this is confusing and incorrect, as we should not have combined the term O<sub>2</sub> mole fraction with the unit of per meg. We have changed the text from:

Excluding ZT20, which had an O<sub>2</sub> mole fraction of 294 per meg, the ZT O<sub>2</sub> mole fraction ranged from -478 per meg to -1363 per meg.

To:

Excluding ZT20, which had an O<sub>2</sub> value of 294 per meg, the ZT O<sub>2</sub> values ranged from -478 per meg to -1363 per meg.

17. L474-479: There is a cumbersome emphasis here on the compatibility goal, usually with no added discussion. There is also a repeated pattern of verbally describing the values in a table within the text. I think all of this can be cut.

We have shortened and reworded this paragraph, from:

If we exclude the 3 ZTs that were vertical, the ZT repeatability is on average for O<sub>2</sub>  $\pm 3.1 \pm 5.3$  per meg, which is more than the  $\pm 1$  per meg repeatability goal, and less than the extended repeatability goal of  $\pm 5$  per meg, but the  $\pm 1\sigma$  standard deviation is higher. The O<sub>2</sub> repeatability based on the ZTs is similar to the O<sub>2</sub> repeatability based on the TTs ( $\pm 3.0 \pm 4.6$  per meg, see Sect. 3.2), which increases our confidence, that this is the O<sub>2</sub> repeatability of the measurement system. The average CO<sub>2</sub> repeatability based on the ZTs is  $\pm 0.005 \pm 0.019$  ppm, which is again similar to the CO<sub>2</sub> repeatability based on the TTs, ( $\pm 0.005 \pm 0.023$  ppm, see Sect. 3.2).

To:

If we exclude the 3 ZTs that were vertical, the average CO<sub>2</sub> and O<sub>2</sub> repeatability based on the ZTs is  $\pm 0.005 \pm 0.019$  ppm and  $\pm 3.1 \pm 5.3$  per meg, respectively, which is similar to the CO<sub>2</sub> and O<sub>2</sub> repeatability based on the TTs ( $\pm 0.005 \pm 0.023$  ppm and  $\pm 3.0 \pm 4.6$  per meg, see Sect. 3.2). These results increase our confidence, that this is the repeatability of the measurement system.

18. L533: Calibration cylinders should be remeasured to account for cylinder drift. I think the authors should try to constrain how much this contributes to the uncertainty. Also, From Fig 8 it looks like the changes in the slope are small due to changing of calibration tanks, but it should be shown that this is a small effect. Have the authors indicated whether the calibration coefficients are interpolated between calibrations, or applied as step changes? I may have missed this.

We thank the reviewer for this comment. It is already stated in the text that the calibration coefficients are applied as step changes and not interpolated between calibrations, in lines 189-190:

With the exception of the CO<sub>2</sub> c-term, the calibration coefficients are redetermined every 47 hours, and then these new values are used until the next calibration.

We agree with the reviewer that ideally the calibration cylinders would be remeasured to account for cylinder drift, but for practical reasons it has not been possible to do this for Weybourne yet, though we still hope to measure some of our TTs in the near future. However, we have no reason to believe that the WAO scale has drifted relative to the UEA CRAM Laboratory or to the Scripps Institution of Oceanography scale, as shown by the intercomparison programme results.

In lines 504-506, we state:

A drift in the calibration scale may be caused by internal drift of the mole fractions in the calibration cylinders. This can only be determined by reanalysing the calibration cylinders after they have finished being measured at WAO. However, due to practical constraints this is not done on the calibration cylinders used at WAO.

We have added a couple of sentences to the end of this paragraph for clarification:

While, we cannot know if the calibration cylinders have drifted over time, if they had drifted we would expect to see a noticeable step change in the air measurements when the calibration cylinders are changed, and/or visible drift in the TT measurements (depending on the rate of the drift). In addition, we would expect to see evidence of long-term drift in our intercomparison programme results.

19. L673-688: The lengthy text on technical issues should be at least separated from the text on missing APO data. I think this information needs to be formatted into a table or change log of some kind, with exact dates, spanning the whole dataset. As it is only approximate dates are given and the user would have to guess if subtle features in the dataset might be artifacts pertaining to such changes. There is also not enough detail--for instance, "pneumatic valves" and "solenoid valves". Could the authors reference the plumbing diagram directly in a way which is unambiguous?

Please, see our reply above that discusses this. We do not believe it is necessary to include a change log, as this is not something that is typically expected for a measurement related paper, it



would be unlikely that we could include enough detail to ensure that readers would be able to understand what the potential impacts on the data could be. The data have been rigorously quality controlled to ensure the data have not been unduly impacted by technical changes to the system and any data that have been impacted have been removed. The technical issues that have led to large gaps in the data, are described in the text because it is necessary to explain to the reader why those large gaps in the data exist.

We have moved the missing APO data text and the technical issues text into separate paragraphs and have added more detail about the pneumatic valves and solenoid valves and referenced the plumbing diagram.

20. L687: "was not so it had to be removed from the dataset." -- missing word or typo?

We thank the reviewer for spotting this error and we have reworded this sentence.

21. L703-713: This is analysis of the dataset, per the "Aims and Scope" of ESSD: "Any interpretation of data is outside the scope of regular articles."

As mentioned above, we agree with the reviewer that some of Section 4 is quite scientific for an ESSD paper. This paragraph has been shortened and reworded and combined with the first paragraph in Section 4.2. Thus, we are only describing the key features of the dataset, rather than analysing or interpreting the underlying science.

We have changed this paragraph from:

From Fig. 13 we can see many interesting features of this dataset. Firstly, there are long-term trends in the measurements with increasing mole fractions of CO<sub>2</sub> and decreasing mole fractions of O<sub>2</sub> and APO, predominantly due to the burning of fossil fuels and land-use changes which release CO<sub>2</sub> and consume O<sub>2</sub> (Sect. 4.2). These trends are buffered by an increasing land carbon sink, and the ocean carbon sink is also buffering the CO<sub>2</sub> trend but not the O<sub>2</sub> trend (Keeling et al., 1996a). Secondly, there are seasonal cycles: CO<sub>2</sub> has higher mole fractions during the winter and lower mole fractions during the summer, while the seasonal cycles of O<sub>2</sub> and APO are reversed, with lower mole fractions during the winter and higher mole fractions during the summer (Sect. 4.3). These seasonal cycles are caused by seasonal changes in terrestrial biosphere processes, ocean processes and fossil fuel emissions. Thirdly, it can also be seen that there is a lot of synoptic variability in the species measured at WAO, due to the influence of more local emissions within the atmospheric footprint. The spikes are less common in the APO time series therefore indicating that most of this variability is mostly from terrestrial biosphere processes, and not from the ocean.

To:

From Fig. 13 we can see there are long-term trends in all three species. On average, atmospheric CO<sub>2</sub> at WAO increased by 2.40 ppm yr<sup>-1</sup> (2.38 to 2.42; 95% confidence intervals), atmospheric O<sub>2</sub> decreased by 24.0 per meg yr<sup>-1</sup> (24.3 to 23.8) and APO decreased by 11.4 per meg yr<sup>-1</sup> (11.7 to 11.3). The long-term trends were calculated using the trend from the seasonal decomposition with STL (see Sect. 2.3) and the TheilSen function in the openair package in R (Carslaw and Ropkins, 2012; Carslaw 2019). These long-term trends are predominantly due to the burning of fossil fuels and land-use changes which release CO<sub>2</sub> and consume O<sub>2</sub>. Atmospheric O<sub>2</sub> is decreasing more quickly than CO<sub>2</sub> is increasing because the CO<sub>2</sub> increase is buffered by an increasing land carbon sink and ocean carbon sink, whereas the O<sub>2</sub> decrease is only buffered by an increasing land oxygen source and a small ocean oxygen source from O<sub>2</sub> outgassing (Keeling et al., 1996a).

22. Section 4.2: Same comment as previous, also noting the ESSD "Aims and Scope" statement: "Any comparison to other methods is beyond the scope of regular articles".

As mentioned above, we agree with the reviewer that some of this text is quite scientific for an ESSD paper. As such, we have removed Figure 14 (interannual variability of long-term trends), as well as the second paragraph in Section 4.2, which discusses the interannual variability of the long-term trends and their potential link to ENSO. We have also reworded the first paragraph and combined it with the last paragraph in Section 4.1, so this Section 4.2 no longer exists.

23. L754: "there is no discernible marine influence on the CO<sub>2</sub> seasonal cycle" -- This is not correct, there is a significant component to the seasonal cycle of atmospheric CO<sub>2</sub> from air-sea fluxes. If the authors mean no discernible contribution at WAO, this would be surprising given its location, and needs to be shown.

We respectfully disagree with the reviewer regarding this comment. Perhaps the reviewer is thinking of CO<sub>2</sub> fluxes from the ocean, which do have seasonality, whereas we are referring to the variability of CO<sub>2</sub> mole fractions in the atmosphere. The diagram below visualises the point we are making in the text.

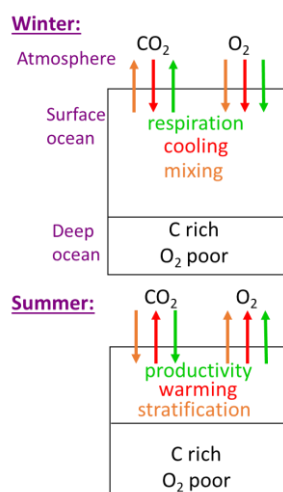

We have made minor amendments to the text with additional references. We have changed this sentence from:

The exchange of CO<sub>2</sub> between the atmosphere and the oceans takes ~1 year (Broecker and Peng, 1974) and so there is **no discernible marine influence on the CO<sub>2</sub> seasonal cycle**, and O<sub>2</sub> fluxes from different ocean processes are reinforcing on seasonal timescales, whereas for CO<sub>2</sub> these counteract (Keeling and Manning, 2014).

To:

The exchange of CO<sub>2</sub> between the atmosphere and the oceans takes ~1 year (Broecker and Peng, 1974), and O<sub>2</sub> fluxes from different ocean processes are reinforcing on seasonal timescales whereas for CO<sub>2</sub> these counteract (Keeling and Manning, 2014). The combined effect of the CO<sub>2</sub> lag and counteracting CO<sub>2</sub> processes is that there is **a minimal marine influence on the atmospheric CO<sub>2</sub> mole fraction seasonal cycle (Heimann et al., 1989; Randerson et al., 1997)**.

24. L805: APO has a diurnal cycle in many locations, better to specify "APO at WAO" to avoid confusion. One would in fact expect a strong diurnal cycle in APO at a coastal site like WAO

due to land/sea breezes. It is also not correct that the boundary layer effects cancel. The changing boundary layer height dilutes or concentrates a flux signal from the surface with background air from higher up in the troposphere. If you had constant outgassing of APO from the ocean surface over 24 hours, for instance, you would still see a diurnal cycle from this effect.

We have changed this sentence from “APO does not...” to “APO at WAO does not...”. However, we respectfully disagree with the reviewer regarding the comment about expecting a strong diurnal cycle in APO. As shown in Fig. 15 there is not a strong diurnal cycle in APO at WAO. Our findings are consistent with other studies (e.g. Kozlova et al., 2008; Wilson, 2012; Pickers, 2016) which show that APO does not exhibit a strong diurnal cycle in the same way that CO<sub>2</sub> and O<sub>2</sub> do, because APO is invariant to terrestrial processes, and because ocean fluxes (even for O<sub>2</sub>) are not instantaneously realised in the atmosphere in the same way terrestrial fluxes are due to air-sea gas exchange processes. APO fluxes from the ocean surface are relatively very small on synoptic scales compared to terrestrial O<sub>2</sub> and CO<sub>2</sub> fluxes, and boundary layer height variations over the ocean are also much smaller compared to those over land. Our research group has many years’ experience making high-precision O<sub>2</sub> and CO<sub>2</sub> measurements over the ocean (e.g. Pickers et al. 2017) and we do not find any evidence of APO diurnal cycles in these data.
